# Supplementary material for: Exploring Morpho-Physiological Variation for Heat Stress Tolerance in Tomato
Source: PubMed Central journal article supplement (PMC7918821; doi:10.3390/plants10020347), 2021-02-12
Supplement: plants-10-00347-s001.pdf [file plants-10-00347-s001.pdf]

Supplementary materials:

Table S1: List of varieties for the first open-field experiment.

| SN | Variety             | Code | Source        | Growth habit        | Description                                                      |
|----|---------------------|------|---------------|---------------------|------------------------------------------------------------------|
| 1  | Amelia*             | AMEL | Seeds n Such  | Determinate, 75 d   | Hybrid, heat/humidity tolerant, Large, 8 to 10-oz., firm, bright |
| 2  | Arkansas Traveler*~ | ARKA | Seeds n Such  | Indeterminate, 87 d | Hybrid, reddish-pink, smooth to a bit rough, weigh 6 to 8-oz     |
| 3  | Better Bush         | BETB | Syngenta      | Determinate, 68 d   | Hybrid, medium to large, 8 oz.                                   |
| 4  | BHN 589*~           | BHN5 | BHN Seed      | Semi-determinate,   | Hybrid, large, 8 to 10-oz., crack-resistant fruits               |
| 5  | BHN-1021*~          | BHN1 | Johnny's Seed | Determinate, 76 d   | Hybrid, 8-16 oz. bright-red slicers                              |
| 6  | Big Beef            | BIGB | Johnny's Seed | Indeterminate, 73 d | Hybrid, Large, 10-12 oz. fruit                                   |
| 7  | Black Krim          | BLKR | Johnny's Seed | Indeterminate, 80 d | Heirloom, Deep brown/red, 8-16 oz.                               |
| 8  | Black Prince        | BLPR | Johnny's Seed | Indeterminate, 74 d | Heirloom, 3–5 oz                                                 |
| 9  | Bolseno F1          | BOLS | Johnny's Seed | Indeterminate, 75 d | Hybrid, 7–12 oz. fruits                                          |
| 10 | Carbon              | CARB | Johnny's Seed | Indeterminate, 76 d | Heirloom, 10-14 oz. fruit                                        |
| 11 | Dixie Red           | DIXI | Seeds n Such  | Determinate, 70 d   | Hybrid, Large, 10-oz. fruits                                     |
| 12 | Estiva*             | ESTI | Johnny's Seed | Indeterminate, 70 d | Hybrid, 7-9 oz. fruits                                           |
| 13 | FL 91*~             | FL91 | Seminis       | Determinate, 72 d   | Hybrid, Very large, 10-oz.                                       |
| 14 | Fall 2018-253       | FAL  | TAMU-WES      | Early Determinate   | Inbreed line, large cherry type, sweet, pink fruits              |
| 15 | TAM-FLW1            | FLW1 | TAMUWES       | Determinate, 75 d   | Hybrid, large beefsteak, red fruits                              |
| 16 | TAM-FLW3~           | FLW3 | TAMU-Carlos   | Determinate, 75 d   | Hybrid, large beefsteak, red fruits                              |
| 17 | Heat Master*~       | HEAT | Seeds n Such  | Determinate, 75 d   | Hybrid, 7 to 8-oz., deep red fruits                              |
| 18 | HM-1823*~           | HM   | Clifton Seed  | Determinate,        | Hybrid, large to X-large                                         |
| 19 | Homestead*          | HOME | Seeds n Such  | Determinate, 80 d   | Hybrid, 8 oz., bright red fruits                                 |

Table S1 Continued

| SN | Variety           | Code | Source                 | Growth habit        | Description                                              |
|----|-------------------|------|------------------------|---------------------|----------------------------------------------------------|
| 20 | HT 1*~            | HT1  | TAMU-CS                | Determinate, 75 d   | Heirloom, 10 oz fruits                                   |
| 21 | HT 2*             | HT2  | TAMU-Crosby            | Determinate, 75 d   | Heirloom, 8-10 oz fruits                                 |
| 22 | LaF44*            | LaF4 | TAMU-Crosby            | Determinate, 75d    | Hybrid, 6 oz fruits                                      |
| 23 | LaF77             | LaF7 | TAMU-Crosby            | Determinate, 75d    | Hybrid, 6-7 oz fruits                                    |
| 24 | LaF66*            | LaF6 | TAMU-Crosby            | Determinate, 75 d   | Hybrid, 6-7 sized fruits                                 |
| 25 | Manalucie FSt     | MANA | Seeds n Such           | Indeterminate, 82 d | Hybrid, Large, bright red, globe-shaped, 1-lb. fruits    |
| 26 | New Girl*~        | NEWG | Johnny's Seed          | Indeterminate, 62 d | Hybrid, 4-6 oz. fruit                                    |
| 27 | Phoenix*~         | PH   | Seminis Vegetable Seed | Determinate, 72 d   | Hybrid, Bright red, 8-oz. fruits                         |
| 28 | Picus*~           | PICU | Seeds n Such           | Determinate, 79 d   | Hybrid, 4 to 5-oz., deep red, roma-shaped, blocky fruits |
| 29 | Porter            | PORT | Seeds n Such           | Indeterminate, 78 d | Hybrid, small, 2-oz., plum-shaped, smooth, dark pink     |
| 30 | Pruden's Purple*~ | PP   | Johnny's Seed          | Indeterminate, 67 d | Heirloom, Large to very large (many over 1 lb.) fruits   |
| 31 | Rally*            | RALY | Sakata Seed America    | Determinate, 72 d   | Hybrid, 9-10 oz. large red fruits                        |
| 32 | RS 1              | RS1  | TAMU                   | Determinate, 75d    | Hybrid, 5-7 oz fruits                                    |
| 33 | RS 8              | RS8  | TAMU                   | Determinate, 75d    | Hybrid, 6-8 oz fruits                                    |
| 34 | Shourouq*~        | SQ   | Seminis Vegetable Seed | Determinate, 75 d   | Hybrid, 8-12 oz fruits                                   |
| 35 | Skyway            | SYW  | Johnny's Seed          | Determinate, 78 d   | Hybrid, 8-12 oz. fruits                                  |
| 36 | Summerpick        | SUME | Syngenta               | Determinate, 75 d   | Hybrid, extra-large to jumbo, 11.3 oz. fruit             |
| 37 | Tasti-Lee*~       | TL   | Bejo Seeds, Inc        | Determinate,        | Hybrid                                                   |
| 38 | Tribeca*~         | TRIB | Vilmorin               | Determinate, 70 d   | Hybrid, 9-10 oz.                                         |
| 39 | Valley Girl*~     | VG   | Johnny's Seed          | Determinate, 65 d   | Hybrid, 7-8 oz. globe-shaped red fruits                  |

Table S1 Continued

| SN | Variety      | Code | Source                    | Growth habit         | Description                                               |
|----|--------------|------|---------------------------|----------------------|-----------------------------------------------------------|
| 40 | Wisconsin 55 | WISC | Johnny's Seed             | Indeterminate, 80 d  | Hybrid, 6–8 oz. fruits                                    |
| 41 | Bella Rosa*~ | BR   | Sakata Seed America, Inc. | Determinate, 74 d    | Hybrid, Large, 10 to 12-oz., round, deep red, firm fruits |
| 42 | Celebrity*~  | CELE | Clifton Seed              | Determinate, 70-75 d | Hybrid, 7-8 oz, globe-shaped, firm red fruits             |
| 43 | Tonopah      | TONO | Seeds n Such              | Determinate, 67 d    | Hybrid, 10 oz, globe-shaped red fruits                    |

\*genotypes used in open field experiments in both 2019/2020, ~ genotypes used in control environment experiment.

Table S2: ANOVA of different parameters measured in the second experiment (greenhouse and growth-chamber) as influenced by varieties (var) and heat-treatments (trt).

| Parameter                            | SOV     | P-value  | Significance |
|--------------------------------------|---------|----------|--------------|
| <b>Chlorophyll Fluorescence (CF)</b> | var     | 5.98E-06 | ***          |
|                                      | trt     | 1.88E-11 | ***          |
|                                      | var*trt | 3.48E-06 | ***          |
| <b>SPAD</b>                          | var     | 1.69E-11 | ***          |
|                                      | trt     | < 2e-16  | ***          |
|                                      | var*trt | 0.00428  | **           |
| <b>Plant Height (Ht)</b>             | var     | 2.21E-08 | ***          |
|                                      | trt     | < 2e-16  | ***          |
|                                      | var*trt | 0.000347 | ***          |
| <b>Stem Diameter (D)</b>             | var     | 5.83E-08 | ***          |
|                                      | trt     | 5.86E-09 | ***          |
|                                      | var*trt | 9.21E-07 | ***          |
| <b>Heat Injury Index (HII)</b>       | var     | <2e-16   | ***          |
|                                      | trt     | <2e-16   | ***          |
|                                      | var*trt | <2e-16   | ***          |

\*\*\*, \*\*, \* show significant difference at  $P \leq 0.001, 0.01, 0.05$ , respectively.

NS means not significant at  $P \leq 0.05$ .

Table S3: ANOVA of different parameters as influenced by varieties (var) and stages (Stage-1: 56 DAT, 34 °C and Stage-2: 86 DAT, 41°C).

| SN | Parameter                                        | SOV         | P-value  | Significance |
|----|--------------------------------------------------|-------------|----------|--------------|
| 1. | Net Photosynthesis Rate (Pn)                     | Var         | 0.8253   | NS           |
|    |                                                  | Stage       | 0.0605   | NS           |
|    |                                                  | Block       | <2e-16   | ***          |
|    |                                                  | Var × Stage | 0.804    | NS           |
| 2. | Stomatal Conductance (gs)                        | Var         | 0.1892   | NS           |
|    |                                                  | Stage       | <2e-16   | ***          |
|    |                                                  | Block       | 0.0786   | NS           |
|    |                                                  | Var × Stage | 0.0833   | NS           |
| 3. | Intercellular CO <sub>2</sub> Concentration (Ci) | Var         | 0.771    | NS           |
|    |                                                  | Stage       | <2e-16   | ***          |
|    |                                                  | Block       | 1.31E-13 | ***          |
|    |                                                  | Var × Stage | 0.892    | NS           |
| 4. | Transpiration rate (E)                           | Var         | 0.00752  | **           |
|    |                                                  | Stage       | 5.88E-06 | ***          |
|    |                                                  | Block       | 2.76E-05 | ***          |
|    |                                                  | Var × Stage | 0.02974  | *            |
| 5. | Leaf Temperature (LT)                            | Var         | 1        | NS           |
|    |                                                  | Stage       | < 2e-16  | ***          |
|    |                                                  | Block       | 3.36E-09 | ***          |
|    |                                                  | Var × Stage | 0.999    | NS           |
| 6. | Initial Fluorescence (Fo)                        | Var         | 0.0977   | NS           |
|    |                                                  | Stage       | <2e-16   | ***          |
|    |                                                  | Block       | 2.46E-09 | ***          |
|    |                                                  | Var × Stage | 0.1675   | NS           |
| 7. | Maximum Fluorescence (Fm)                        | Var         | 0.00143  | ***          |
|    |                                                  | Stage       | < 2e-16  | ***          |
|    |                                                  | Block       | < 2e-16  | ***          |
|    |                                                  | Var × Stage | 0.00337  | **           |
| 8. | SPAD value                                       | Var         | 7.31E-11 | ***          |
|    |                                                  | Stage       | < 2e-16  | ***          |
|    |                                                  | Block       | 0.58358  | NS           |
|    |                                                  | Var × Stage | 0.00545  | **           |

Table S3: Continued

| SN  | Parameter                                                          | SOV         | P-value  | Significance |
|-----|--------------------------------------------------------------------|-------------|----------|--------------|
| 9.  | Chlorophyll<br>Fluorescence (CF)                                   | Var         | 0.131    | NS           |
|     |                                                                    | Stage       | < 2e-16  | ***          |
|     |                                                                    | Block       | 7.02E-07 | ***          |
|     |                                                                    | Var × Stage | 0.134    | NS           |
| 10. | Instantaneous<br>Water Use<br>Efficiency<br>(WUE <sub>inst</sub> ) | Var         | 0.836    | NS           |
|     |                                                                    | Stage       | 8.30E-08 | ***          |
|     |                                                                    | Block       | < 2e-16  | ***          |
|     |                                                                    | Var × Stage | 0.97     | NS           |
| 11. | Intrinsic Water<br>Use Efficiency<br>WUE <sub>intr</sub>           | Var         | 0.682    | NS           |
|     |                                                                    | Stage       | < 2e-16  | ***          |
|     |                                                                    | Block       | 6.15E-12 | ***          |
|     |                                                                    | Var × Stage | 0.796    | NS           |
| 12. | Electrolyte<br>Leakage (EL)                                        | Var         | < 2e-16  | ***          |
|     |                                                                    | Stage       | < 2e-16  | ***          |
|     |                                                                    | Block       | 0.2      | NS           |
|     |                                                                    | Var × Stage | 7.68E-13 | ***          |
| 13. | Heat Injury Index<br>(HII)                                         | Var         | < 2e-16  | ***          |
|     |                                                                    | Stage       | 1.11E-06 | ***          |
|     |                                                                    | Block       | 0.92813  | NS           |
|     |                                                                    | Var × Stage | 0.00262  | **           |
| 14. | Marketable Yield                                                   | Var         | 3.4e-12  | ***          |
|     |                                                                    | Block       | 0.124    |              |

\*\*\*, \*\*, \* show significant difference at  $P \leq 0.001, 0.01, 0.05$ , respectively.

NS means not significant at  $P \leq 0.05$ .

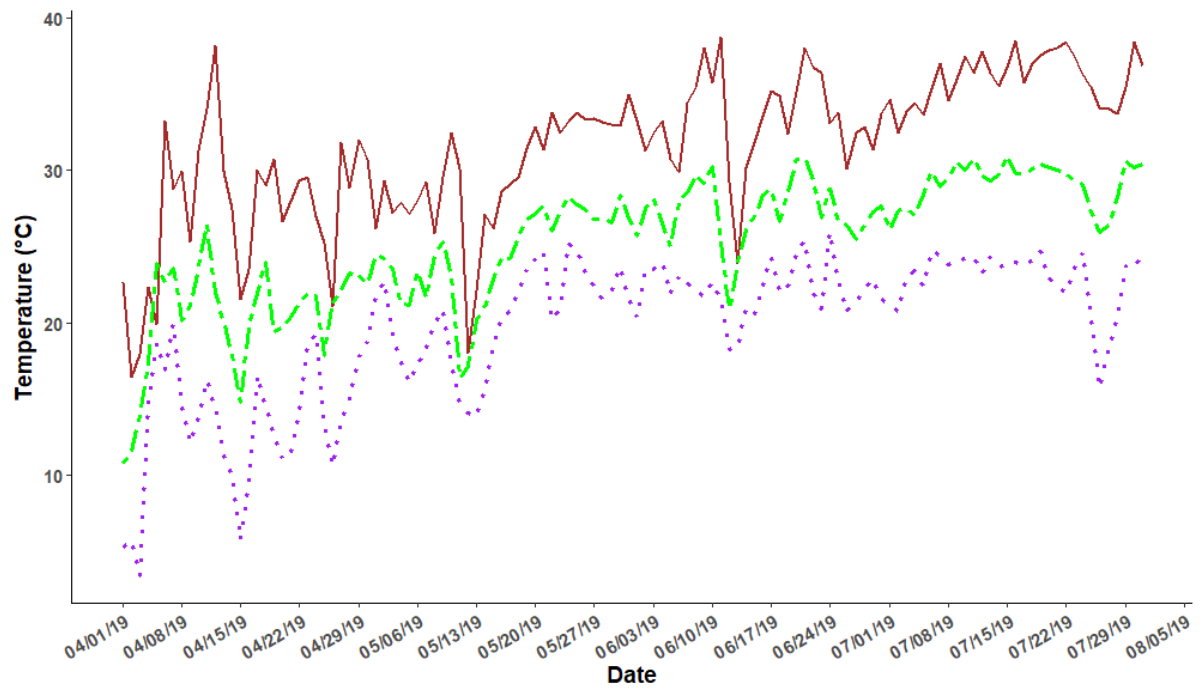

Figure S1: Temperature graph for Uvalde, TX from April 2019–July 2019, when the tomato plants were grown in the open-field for heat-stress tolerance screening. The brown, green, and purple lines indicate daily maximum, average, and minimum temperatures, respectively.

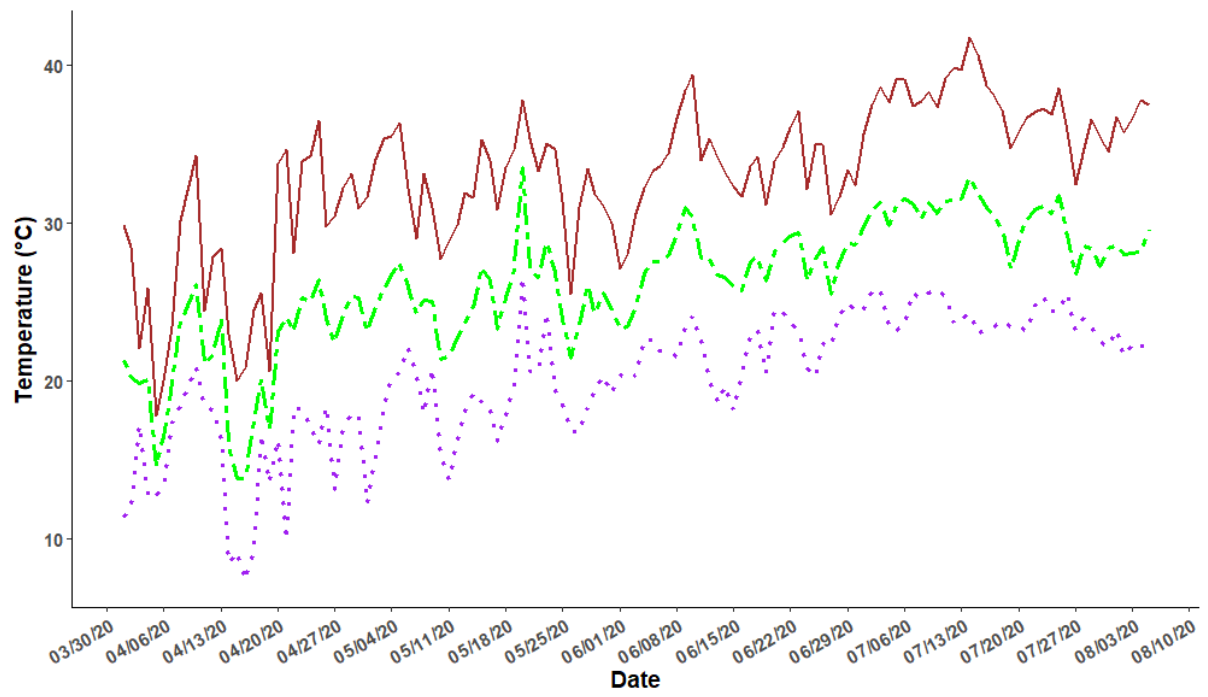

Figure S2: Temperature graph for Uvalde, TX from April 2020–July 2020, when the tomato plants were grown in the open-field for heat-stress tolerance screening. The brown, green, and purple lines indicate daily maximum, average, and minimum temperatures, respectively.
